# Supplementary material for: The Mating Type Locus (MAT) and Sexual Reproduction of Cryptococcus heveanensis: Insights into the Evolution of Sex and Sex-Determining Chromosomal Regions in Fungi
Source: PLOS journal article supplement (doi:10.1371/journal.pgen.1000961), 2010-05-20

Figure S3 (A)

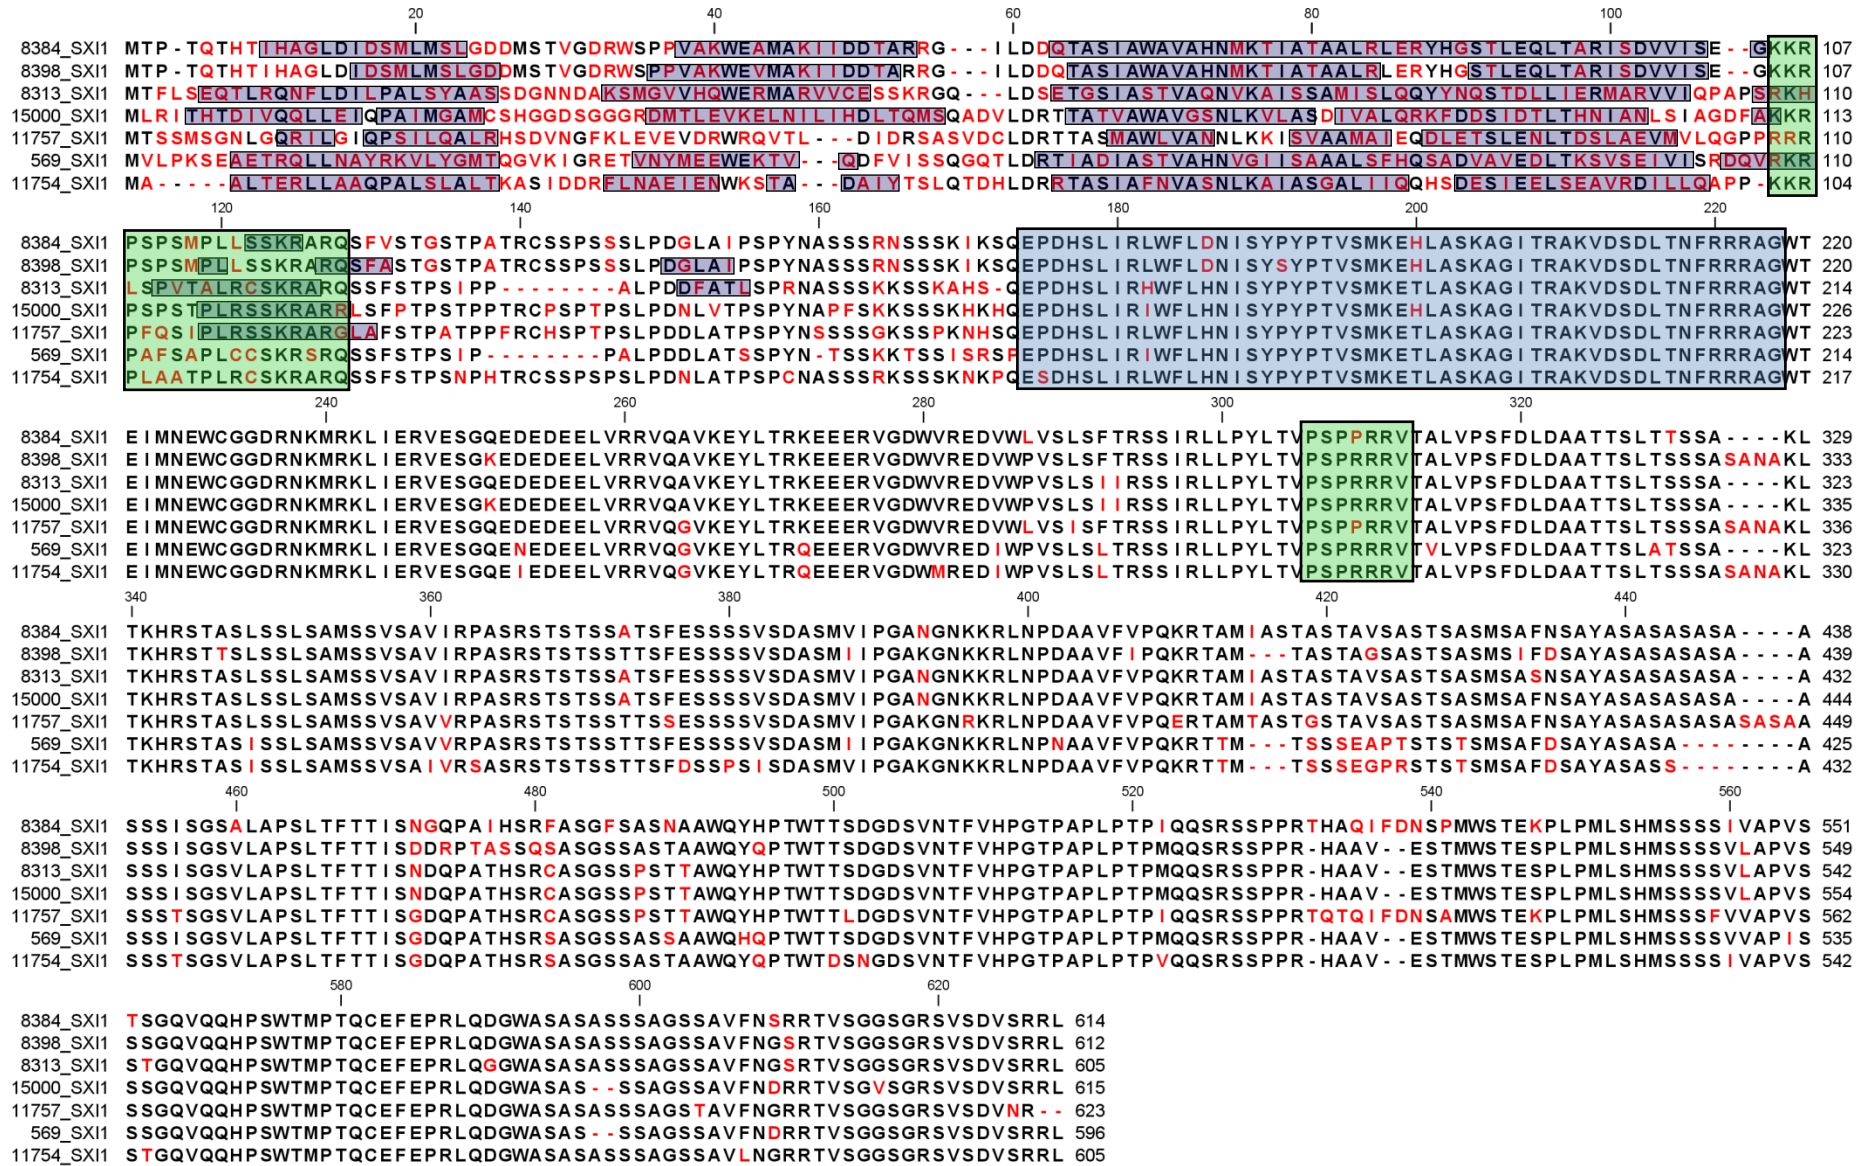

Figure S3 (B)

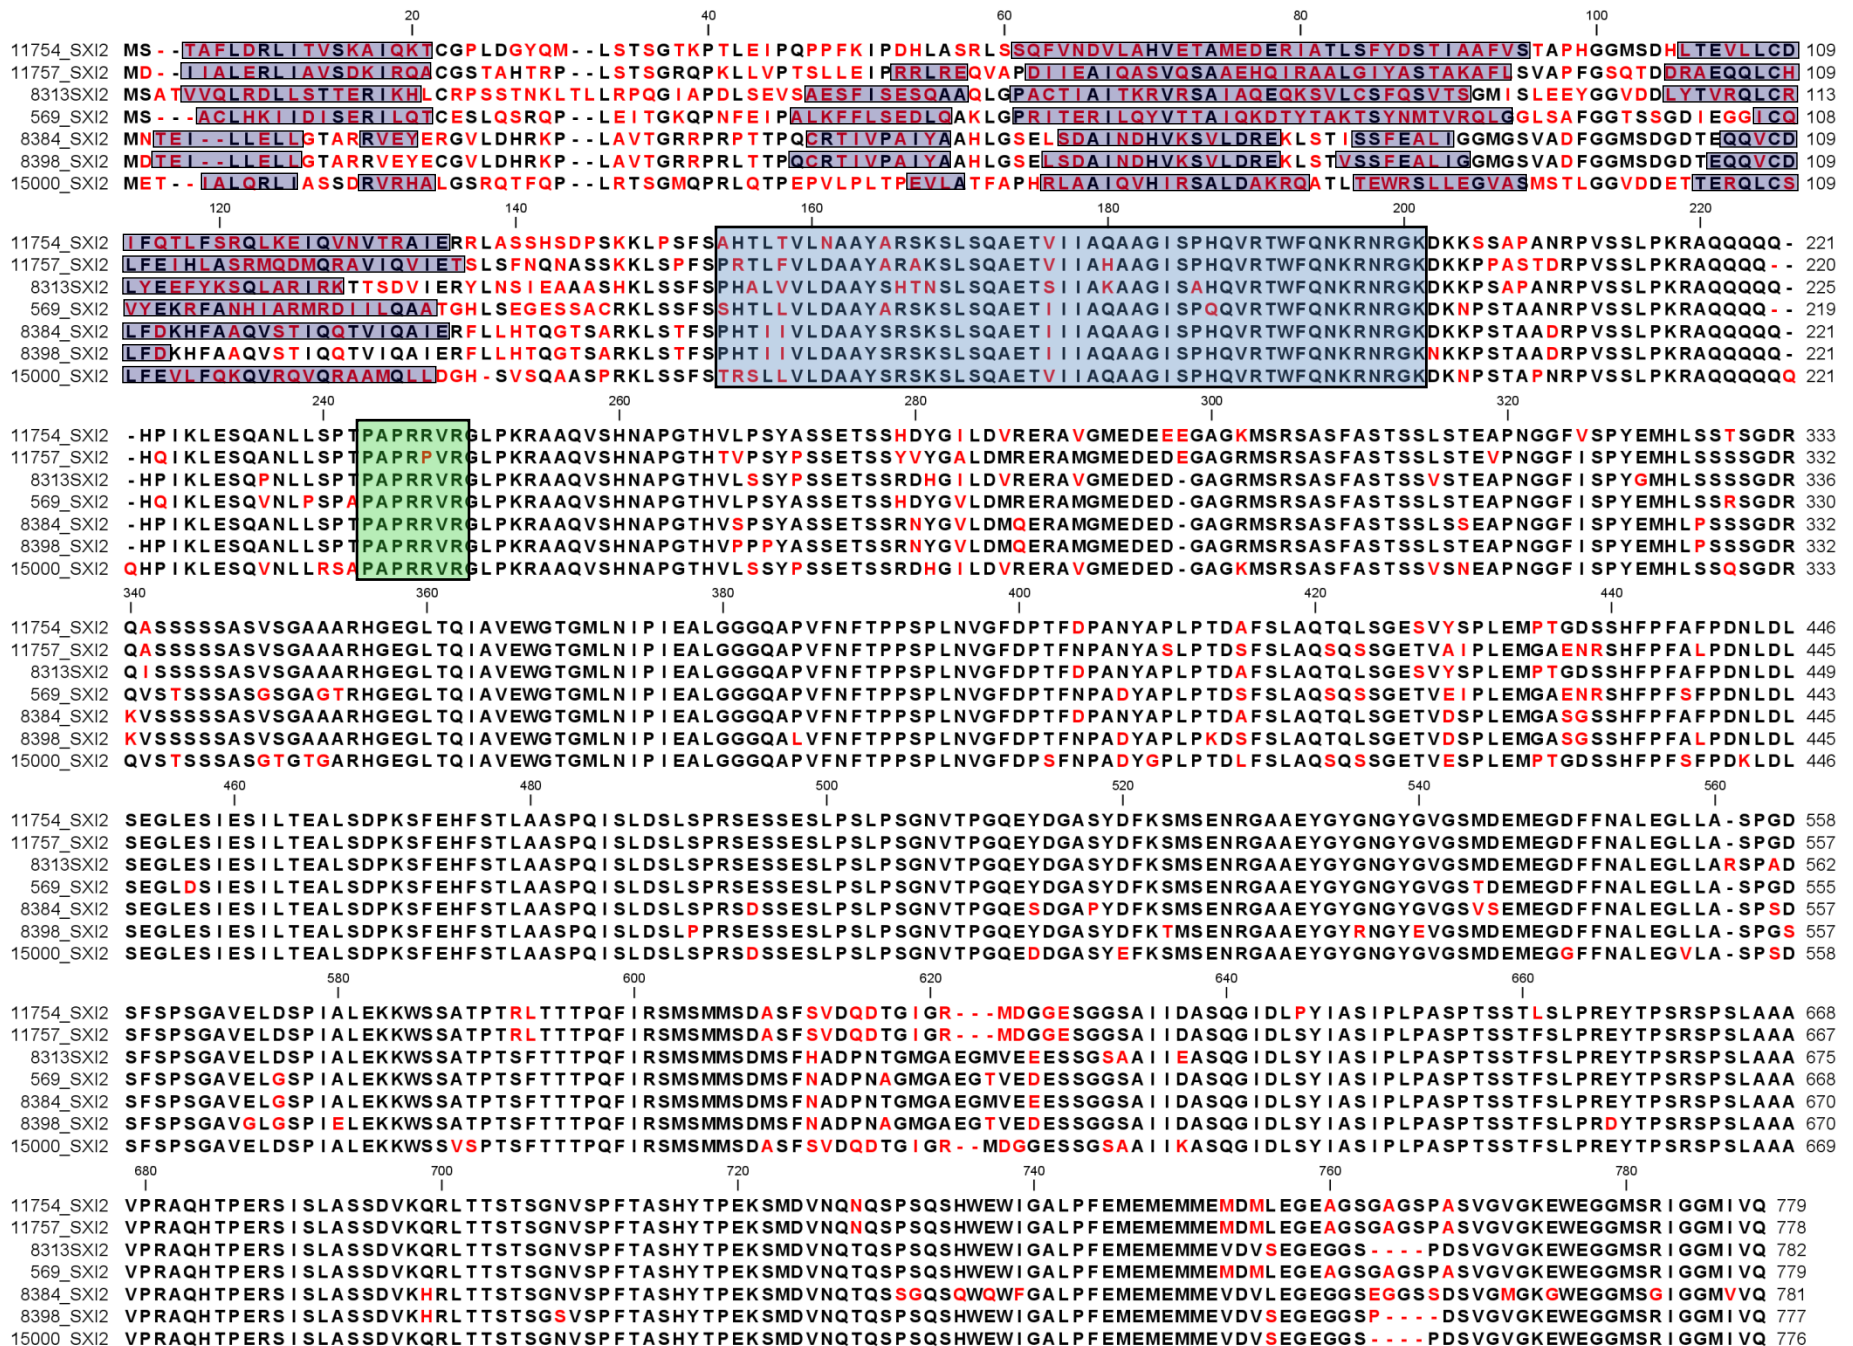

Supplement: S3 (10.1371/journal.pgen.1000961.s003) [file journal.pgen.1000961.s003]
